# Supplementary material
Source: publisher figshare collection journal article supplement (https://sage.figshare.com/ndownloader/files/23797815)
Supplement: Supplementary file 1 [file 23797815]

## Appendix A: IN-SEEM Model Specifications

| Electricity consumption—Commercial                            |                      |                      |         |
|---------------------------------------------------------------|----------------------|----------------------|---------|
| Predictive variable                                           | Coefficient estimate | Standardized $\beta$ | p-value |
| Electricity price—Commercial                                  | -483.980             | -0.16                | (0.002) |
| Natural gas price—Commercial                                  | 453.230              | 0.05                 | (0.009) |
| Employment in the Wholesale trade sector                      | 0.145                | 0.12                 | (0.000) |
| Employment in Finance, Insurance, and Real Estate; 1-year lag | 0.126                | 0.29                 | (0.000) |
| Earnings per employee in the Government sector                | 1,535                | 0.51                 | (0.000) |
| <b>Adjusted R-squared</b>                                     | <b>0.991</b>         |                      |         |
| Electricity consumption—Industrial                            |                      |                      |         |
| Predictive variable                                           | Coefficient estimate | Standardized $\beta$ | p-value |
| Electricity price—Industrial                                  | -772.510             | -0.18                | (0.013) |
| Gross state product, per capita                               | 3,679,372            | 0.82                 | (0.000) |
| <b>Adjusted R-squared</b>                                     | <b>0.963</b>         |                      |         |
| Electricity consumption—residential                           |                      |                      |         |
| Predictive variable                                           | Coefficient estimate | Standardized $\beta$ | p-value |
| Electricity price—residential                                 | -1,098               | -0.34                | (0.000) |
| Natural gas price—residential; 2-year lag                     | 1,485                | 0.15                 | (0.000) |
| Employment in Finance, Insurance, and Real Estate             | 0.296                | 0.62                 | (0.000) |
| Cooling degree days, annual                                   | 10.297               | 0.09                 | (0.000) |
| <b>Adjusted R-squared</b>                                     | <b>0.987</b>         |                      |         |
| Natural gas consumption—Commercial                            |                      |                      |         |
| Predictive variable                                           | Coefficient estimate | Standardized $\beta$ | p-value |
| Natural gas price—Commercial                                  | -1,084               | -0.25                | (0.051) |
| Natural gas price—Commercial; 1-year lag                      | -661.912             | -0.15                | (0.043) |
| Electricity price—Commercial; 2-year lag                      | -1,231               | -0.98                | (0.000) |
| Heating degree days, annual                                   | 7.474                | 0.38                 | (0.000) |
| Heating degree days, annual; 2-year lag                       | -5.084               | -0.28                | (0.019) |
| Earnings per employee in the Retail Trade sector              | 642.673              | 0.24                 | (0.059) |
| Earnings per employee in the Government sector; 1-year lag    | -521.676             | -0.38                | (0.054) |
| <b>Adjusted R-squared</b>                                     | <b>0.827</b>         |                      |         |
| Natural gas consumption—Industrial                            |                      |                      |         |

| Predictive variable                                             | Coefficient estimate | Standardized $\beta$ | p-value |
|-----------------------------------------------------------------|----------------------|----------------------|---------|
| Natural gas price–Industrial                                    | -4,177               | -0.22                | (0.005) |
| Motor gas price–Transportation                                  | 3,808                | 0.57                 | (0.000) |
| Electricity consumption–Industrial; 1-year lag                  | 0.852                | 0.64                 | (0.000) |
| Employment in all Industrial sectors                            | 0.257                | 0.63                 | (0.000) |
| Employment in the Manufacturing sector; 1-year lag              | -0.203               | -0.40                | (0.000) |
| Earnings per employee in Transportation & Utilities; 1-year lag | -2,207               | -0.19                | (0.026) |
| Natural gas price–Industrial; 1-year lag                        | -5,188               | -0.27                | (0.001) |
| <b>Adjusted R-squared</b>                                       | <b>0.895</b>         |                      |         |

| Natural gas consumption–Residential             |                      |                      |         |
|-------------------------------------------------|----------------------|----------------------|---------|
| Predictive variable                             | Coefficient estimate | Standardized $\beta$ | p-value |
| Natural gas price–Residential; 1-year lag       | -1,261               | -0.20                | (0.048) |
| Electricity price–Residential; 2-year lag       | -1,174               | -0.60                | (0.004) |
| Natural gas consumption–Residential; 2-year lag | 0.117                | 0.11                 | (0.093) |
| Electricity consumption–Residential             | -0.329               | -0.52                | (0.014) |
| Heating degree days, annual                     | 23.919               | 0.77                 | (0.000) |
| Unemployment rate                               | -159,566             | -0.34                | (0.001) |
| <b>Adjusted R-squared</b>                       | <b>0.858</b>         |                      |         |

| Motor gas consumption–Transportation                          |                      |                      |         |
|---------------------------------------------------------------|----------------------|----------------------|---------|
| Predictive variable                                           | Coefficient estimate | Standardized $\beta$ | p-value |
| Motor gas price–Transportation                                | -1,473               | -0.22                | (0.004) |
| Motor gas consumption–Transportation; 2-year lag              | 0.266                | 0.26                 | (0.046) |
| Employment in the Manufacturing sector                        | 0.123                | 0.25                 | (0.000) |
| Earnings per employee in the Manufacturing sector; 1-year lag | 2,261                | 0.34                 | (0.001) |
| Earnings per employee in the Retail Trade sector              | 4,617                | 0.39                 | (0.005) |
| Employment in Transportation & utilities; 1-year lag          | 0.666                | 0.32                 | (0.001) |
| <b>Adjusted R-squared</b>                                     | <b>0.953</b>         |                      |         |

| Employment in the Construction sector               |                      |                      |         |
|-----------------------------------------------------|----------------------|----------------------|---------|
| Predictive variable                                 | Coefficient estimate | Standardized $\beta$ | p-value |
| Electricity price–Industrial; 2-year lag            | -1,054               | -0.18                | (0.001) |
| Employment in Finance, Insurance, and Real Estate   | -0.207               | -0.22                | (0.003) |
| Employment in the Wholesale Trade sector            | 2.563                | 0.95                 | (0.000) |
| Earnings per employee in Transportation & Utilities | 2,337                | 0.15                 | (0.000) |
| Employment in the Government sector                 | -0.231               | -0.22                | (0.005) |
| <b>Adjusted R-squared</b>                           | <b>0.994</b>         |                      |         |

| Employment in the Farming sector |  |  |  |
|----------------------------------|--|--|--|
|----------------------------------|--|--|--|

| Predictive variable                             | Coefficient estimate | Standardized $\beta$ | p-value |
|-------------------------------------------------|----------------------|----------------------|---------|
| Employment in the Farming sector; national      | 0.020                | 0.54                 | (0.000) |
| Employment in the Government sector; 1-year lag | -0.204               | -0.35                | (0.000) |
| Employment in the Construction sector           | -0.125               | -0.22                | (0.000) |
| <b>Adjusted R-squared</b>                       | <b>0.988</b>         |                      |         |

#### Employment in Finance, Insurance, and Real Estate

| Predictive variable                                  | Coefficient estimate | Standardized $\beta$ | p-value |
|------------------------------------------------------|----------------------|----------------------|---------|
| Electricity consumption–Commercial; 2-year lag       | -1,039               | -0.16                | (0.031) |
| Motor gas price–Transportation                       | 1,654                | 0.21                 | (0.000) |
| Nonwage income, per capita; 2-year lag               | 13,625               | 0.84                 | (0.000) |
| Employment in the Government sector; 1-year lag      | -0.308               | -0.29                | (0.065) |
| Employment in the Wholesale Trade sector; 1-year lag | 0.528                | 0.19                 | (0.001) |
| <b>Adjusted R-squared</b>                            | <b>0.981</b>         |                      |         |

#### Employment in the Government sector

| Predictive variable                           | Coefficient estimate | Standardized $\beta$ | p-value |
|-----------------------------------------------|----------------------|----------------------|---------|
| Labor force participation rate; 2-year lag    | 201,074              | 0.33                 | (0.001) |
| Employment in the Services sector; 1-year lag | 0.035                | 0.34                 | (0.005) |
| Motor gas consumption–Transportation          | -0.211               | -0.20                | (0.004) |
| Electricity consumption–Commercial            | 1.392                | 0.66                 | (0.000) |
| <b>Adjusted R-squared</b>                     | <b>0.982</b>         |                      |         |

#### Employment in the Manufacturing sector

| Predictive variable                                  | Coefficient estimate | Standardized $\beta$ | p-value |
|------------------------------------------------------|----------------------|----------------------|---------|
| Natural gas price–Industrial; 1-year lag             | -4,857               | -0.13                | (0.034) |
| Employment in the Services sector; 1-year lag        | -0.276               | -1.38                | (0.000) |
| Employment in the Construction sector                | 2.951                | 1.60                 | (0.000) |
| Employment in Transportation & Utilities; 1-year lag | -2.028               | -0.47                | (0.000) |
| <b>Adjusted R-squared</b>                            | <b>0.949</b>         |                      |         |

#### Employment in the Mining sector

| Predictive variable                        | Coefficient estimate | Standardized $\beta$ | p-value |
|--------------------------------------------|----------------------|----------------------|---------|
| Electricity price–Industrial; 1-year lag   | 130.617              | 0.38                 | (0.015) |
| Employment in the Construction sector      | -0.055               | -0.97                | (0.000) |
| Employment in Transportation & Utilities   | 0.060                | 0.45                 | (0.000) |
| Labor force participation rate; 2-year lag | -14,563              | -0.40                | (0.001) |
| <b>Adjusted R-squared</b>                  | <b>0.952</b>         |                      |         |

| Employment in the Retail Trade sector                           |                      |                      |         |
|-----------------------------------------------------------------|----------------------|----------------------|---------|
| Predictive variable                                             | Coefficient estimate | Standardized $\beta$ | p-value |
| Electricity consumption–Commercial; 1-year lag                  | 2.707                | 0.51                 | (0.000) |
| Motor gas price–Transportation                                  | -3,501               | -0.20                | (0.000) |
| Motor gas consumption–Transportation; 1-year lag                | 1.100                | 0.41                 | (0.000) |
| Earnings per employee in Transportation & Utilities; 1-year lag | -4,504               | -0.14                | (0.019) |
| Adjusted R-squared                                              | 0.983                |                      |         |

| Employment in the Services sector                 |                      |                      |         |
|---------------------------------------------------|----------------------|----------------------|---------|
| Predictive variable                               | Coefficient estimate | Standardized $\beta$ | p-value |
| Employment in Finance, Insurance, and Real Estate | 2.367                | 0.27                 | (0.000) |
| Motor gas consumption–Transportation              | -0.603               | -0.06                | (0.014) |
| Employment in the Retail Trade sector             | 0.319                | 0.08                 | (0.020) |
| Electricity consumption–Commercial                | 8.732                | 0.42                 | (0.000) |
| Adjusted R-squared                                | 0.999                |                      |         |

| Employment in Transportation & Utilities       |                      |                      |         |
|------------------------------------------------|----------------------|----------------------|---------|
| Predictive variable                            | Coefficient estimate | Standardized $\beta$ | p-value |
| Electricity consumption–Industrial; 2-year lag | -0.157               | -0.26                | (0.005) |
| Motor gas price–Transportation; 2-year lag     | 378.672              | 0.11                 | (0.009) |
| Employment in the Construction sector          | -0.200               | -0.48                | (0.000) |
| Employment in the Wholesale Trade sector       | 1.442                | 1.27                 | (0.000) |
| Gross domestic product, per capita             | 1,265,699            | 0.46                 | (0.000) |
| Adjusted R-squared                             | 0.990                |                      |         |

| Employment in the Wholesale Trade sector         |                      |                      |         |
|--------------------------------------------------|----------------------|----------------------|---------|
| Predictive variable                              | Coefficient estimate | Standardized $\beta$ | p-value |
| Electricity price–Commercial; 2-year lag         | 722.069              | 0.31                 | (0.000) |
| Natural gas price–Commercial                     | 736.187              | 0.09                 | (0.003) |
| Electricity consumption–Commercial; 1-year lag   | 0.446                | 0.55                 | (0.000) |
| Motor gas consumption–Transportation; 1-year lag | 0.082                | 0.20                 | (0.000) |
| Employment in the Retail Trade sector            | 0.170                | 1.13                 | (0.000) |
| Adjusted R-squared                               | 0.982                |                      |         |

| Earnings per employee in the Construction sector |  |  |  |
|--------------------------------------------------|--|--|--|
|--------------------------------------------------|--|--|--|

| Predictive variable                              | Coefficient estimate | Standardized $\beta$ | <i>p</i> -value |
|--------------------------------------------------|----------------------|----------------------|-----------------|
| Earnings per employee in the Retail Trade sector | 1.819                | 1.61                 | (0.000)         |
| Motor gas price–Transportation                   | 0.315                | 0.50                 | (0.000)         |
| Motor gas price–Transportation; 1-year lag       | -0.290               | -0.43                | (0.000)         |
| Natural gas price–Industrial                     | -0.318               | -0.18                | (0.001)         |
| Electricity consumption–Industrial; 1-year lag   | 0.000                | 0.19                 | (0.001)         |
| <b>Adjusted <i>R</i>-squared</b>                 | <b>0.953</b>         |                      |                 |

#### Earnings per employee in the Farming sector

| Predictive variable                          | Coefficient estimate | Standardized $\beta$ | <i>p</i> -value |
|----------------------------------------------|----------------------|----------------------|-----------------|
| Electricity price–Industrial                 | 0.428                | 0.23                 | (0.386)         |
| Motor gas price–Transportation; 2-year lag   | -0.120               | -0.05                | (0.820)         |
| Employment in the Farming sector; 1-year lag | 0.000                | -0.85                | (0.011)         |
| <b>Adjusted <i>R</i>-squared</b>             | <b>0.547</b>         |                      |                 |

#### Earnings per employee in Finance, Insurance, and Real Estate

| Predictive variable                        | Coefficient estimate | Standardized $\beta$ | <i>p</i> -value |
|--------------------------------------------|----------------------|----------------------|-----------------|
| Electricity price–Commercial               | -0.842               | -0.68                | (0.000)         |
| Motor gas price–Transportation; 1-year lag | -0.266               | -0.19                | (0.000)         |
| Employment in the Manufacturing sector     | 0.000                | 0.48                 | (0.000)         |
| National unemployment rate                 | 117.986              | 0.29                 | (0.003)         |
| Gross domestic product, per capita         | 1,177                | 0.98                 | (0.000)         |
| National nonwage income, per capita        | -1.204               | -0.50                | (0.010)         |
| <b>Adjusted <i>R</i>-squared</b>           | <b>0.970</b>         |                      |                 |

#### Earnings per employee in the Government sector

| Predictive variable                                          | Coefficient estimate | Standardized $\beta$ | <i>p</i> -value |
|--------------------------------------------------------------|----------------------|----------------------|-----------------|
| Electricity price–Commercial; 1-year lag                     | 0.400                | 0.42                 | (0.000)         |
| Motor gas consumption–Transportation; 1-year lag             | 0.000                | -0.35                | (0.000)         |
| Employment in the Services sector; 1-year lag                | 0.000                | 1.27                 | (0.000)         |
| Earnings per employee in Finance, Insurance, and Real Estate | 0.441                | 0.54                 | (0.000)         |
| <b>Adjusted <i>R</i>-squared</b>                             | <b>0.972</b>         |                      |                 |

#### Earnings per employee in the Manufacturing sector

| Predictive variable                               | Coefficient estimate | Standardized $\beta$ | p-value |
|---------------------------------------------------|----------------------|----------------------|---------|
| Natural gas price–Industrial; 1-year lag          | -0.471               | -0.16                | (0.001) |
| Motor gas price–Transportation                    | -0.137               | -0.13                | (0.004) |
| Electricity consumption–Industrial                | 0.000                | 0.36                 | (0.001) |
| Employment in the Retail Trade sector; 1-year lag | 0.000                | -0.57                | (0.000) |
| Employment in the Services sector; 2-year lag     | 0.000                | 0.54                 | (0.000) |
| <b>Adjusted R-squared</b>                         | <b>0.967</b>         |                      |         |

#### Earnings per employee in the Mining sector

| Predictive variable                                  | Coefficient estimate | Standardized $\beta$ | p-value |
|------------------------------------------------------|----------------------|----------------------|---------|
| Motor gas price–Transportation                       | 0.455                | 0.24                 | (0.045) |
| Employment in the Manufacturing sector               | 0.000                | 0.90                 | (0.000) |
| National earnings per employee in the Mining sector  | 0.316                | 0.61                 | (0.000) |
| Unemployment rate                                    | 180.547              | 0.47                 | (0.007) |
| Motor gas consumption–Transportation; 1-year lag     | 0.000                | 0.47                 | (0.002) |
| Employment in Transportation & Utilities; 1-year lag | 0.000                | -0.30                | (0.018) |
| <b>Adjusted R-squared</b>                            | <b>0.875</b>         |                      |         |

#### Earnings per employee in the Retail Trade sector

| Predictive variable                               | Coefficient estimate | Standardized $\beta$ | p-value |
|---------------------------------------------------|----------------------|----------------------|---------|
| Motor gas price–Transportation                    | -0.076               | -0.14                | (0.028) |
| Electricity consumption–Commercial; 1-year lag    | 0.000                | -0.40                | (0.000) |
| Motor gas consumption–Transportation; 1-year lag  | 0.000                | 0.56                 | (0.000) |
| Employment in the Retail Trade sector; 1-year lag | 0.000                | -0.26                | (0.000) |
| <b>Adjusted R-squared</b>                         | <b>0.961</b>         |                      |         |

#### Earnings per employee in the Services sector

| Predictive variable                                 | Coefficient estimate | Standardized $\beta$ | p-value |
|-----------------------------------------------------|----------------------|----------------------|---------|
| Electricity consumption–Commercial                  | 0.000                | 0.43                 | (0.000) |
| Motor gas price–Transportation                      | -0.049               | -0.07                | (0.001) |
| Earnings per employee in the Wholesale Trade sector | 0.266                | 0.49                 | (0.000) |
| Employment in Transportation & Utilities            | 0.000                | 0.13                 | (0.011) |
| <b>Adjusted R-squared</b>                           | <b>0.986</b>         |                      |         |

#### Earnings per employee in Transportation & Utilities

| Predictive variable | Coefficient estimate | Standardized $\beta$ | p-value |
|---------------------|----------------------|----------------------|---------|
|---------------------|----------------------|----------------------|---------|

|                                                               |              |       |         |
|---------------------------------------------------------------|--------------|-------|---------|
| Natural gas price—Industrial                                  | 0.293        | 0.21  | (0.000) |
| Earnings per employee in the Retail Trade sector              | 1.668        | 1.94  | (0.000) |
| Earnings per employee in the Manufacturing sector; 1-year lag | 0.111        | 0.23  | (0.015) |
| Electricity consumption—Industrial; 1-year lag                | 0.000        | -0.54 | (0.002) |
| Earnings per employee in Finance, Insurance, and Real Estate  | -0.103       | -0.28 | (0.007) |
| <b>Adjusted R-squared</b>                                     | <b>0.950</b> |       |         |

#### Earnings per employee in the Wholesale Trade sector

| Predictive variable                                          | Coefficient estimate | Standardized $\beta$ | p-value |
|--------------------------------------------------------------|----------------------|----------------------|---------|
| Electricity price—Commercial                                 | -0.534               | -0.44                | (0.000) |
| Natural gas price—Commercial; 2-year lag                     | 0.764                | 0.21                 | (0.000) |
| Earnings per employee in the Retail Trade sector; 1-year lag | 0.801                | 0.34                 | (0.000) |
| Motor gas consumption—Transportation; 1-year lag             | 0.000                | 0.28                 | (0.006) |
| <b>Adjusted R-squared</b>                                    | <b>0.959</b>         |                      |         |

#### Gross state product, per capita

| Predictive variable                                          | Coefficient estimate | Standardized $\beta$ | p-value |
|--------------------------------------------------------------|----------------------|----------------------|---------|
| Electricity consumption—Industrial                           | 0.000                | 0.60                 | (0.003) |
| Electricity consumption—Commercial; 1-year lag               | 0.000                | 0.40                 | (0.002) |
| Motor gas price—Transportation; 1-year lag                   | 0.000                | -0.19                | (0.000) |
| Earnings per employee in Finance, Insurance, and Real Estate | 0.000                | -0.22                | (0.008) |
| <b>Adjusted R-squared</b>                                    | <b>0.980</b>         |                      |         |

#### Nonwage income, per capita

| Predictive variable                             | Coefficient estimate | Standardized $\beta$ | p-value |
|-------------------------------------------------|----------------------|----------------------|---------|
| Electricity consumption—Residential             | 0.000                | 0.38                 | (0.003) |
| Motor gas price—Transportation; 1-year lag      | -0.045               | -0.09                | (0.030) |
| Employment in the Government sector; 1-year lag | 0.000                | 0.56                 | (0.000) |
| Natural gas price—Commercial; 1-year lag        | 0.179                | 0.13                 | (0.004) |
| <b>Adjusted R-squared</b>                       | <b>0.969</b>         |                      |         |

#### Unemployment rate

| Predictive variable                                          | Coefficient estimate | Standardized $\beta$ | p-value |
|--------------------------------------------------------------|----------------------|----------------------|---------|
| Earnings per employee in Finance, Insurance, and Real Estate | 0.001                | 0.33                 | (0.002) |
| Employment in the Manufacturing sector                       | 0.000                | -0.40                | (0.001) |
| National unemployment rate                                   | 0.752                | 0.49                 | (0.000) |
| Nonwage income, per capita                                   | -0.005               | -0.49                | (0.006) |
| Motor gas price—Transportation; 1-year lag                   | 0.002                | 0.36                 | (0.000) |
| <b>Adjusted R-squared</b>                                    | <b>0.970</b>         |                      |         |

Note: Intercepts and dummy variables not reported.  $N=33$ .
